# Supplementary material for: Methionine Sulfoxide Reductases of Archaea
Source: PubMed Central journal article supplement (PMC6211008; doi:10.3390/antiox7100124), 2018-09-20
Supplement: antioxidants-07-00124-s001.pdf [file antioxidants-07-00124-s001.pdf]

## Supplemental information

**Table S1.** Phylogenetic distribution of methionine sulfoxide reductase homologs compared to 20S proteasome, superoxide dismutase and other oxidative stress response homologs.

| Phylogenetic classification | 20S<br>$\alpha$ -type | MsrA  | MrsB  | MsrP | fRMsr | MSR<br>-MPT | MPT<br>OR | MSR<br>+MPT | OsmC/<br>Ohr | AhpC<br>-type | Fe/Mn<br>SOD | Ni<br>SOD | Cu/Zn<br>SOD |
|-----------------------------|-----------------------|-------|-------|------|-------|-------------|-----------|-------------|--------------|---------------|--------------|-----------|--------------|
| Bacteria                    | 1854                  | 29628 | 24688 | 5180 | 4990  | +           | 88528     | +           | 46232        | 44713         | 25113        | 1815      | 8763         |
| Eukarya                     | 12755                 | 2542  | 2693  | 1    | 560   | +           | 1886      | +           | 511          | 5620          | 4306         | 34        | 6821         |
| Archaea                     | 1513                  | 959   | 846   | 2    | 77    | +           | 2441      | +           | 1129         | 2442          | 866          | 124       | 25           |
| <u>Asgard</u>               | 17                    | 12    | 8     | -    | 2     | +           | 20        | +           | 29           | 19            | 1            | 4         | -            |
| Heimdallarchaeota           | 4                     | 4     | 2     | -    | 2     | +           | 7         | +           | 6            | 4             | -            | 4         | -            |
| Lokiarchaeota               | 5                     | 3     | 2     | -    | -     | +           | 7         | +           | 7            | 3             | -            | -         | -            |
| Odinarchaeota               | 2                     | 1     | 1     | -    | -     | +           | 1         | +           | 1            | 1             | 1            | -         | -            |
| Thorarchaeota               | 6                     | 4     | 3     | -    | -     | +           | 5         | +           | 15           | 11            | -            | -         | -            |
| <u>DPANN</u>                | 134                   | 47    | 53    | -    | 2     | +           | 6         | +           | 3            | 79            | 74           | 3         | -            |
| <i>Aenigmarchaeota</i>      | 10                    | -     | -     | -    | -     | -           | -         | -           | -            | 6             | 7            | -         | -            |
| Diapherotrites              | 7                     | 1     | 1     | -    | -     | +           | 1         | +           | -            | 4             | 2            | -         | -            |
| Micrarchaeota               | 21                    | 5     | 4     | -    | -     | +           | -         | +           | -            | 12            | 12           | -         | -            |
| Nanohaloarchaeota           | 6                     | 14    | 16    | -    | -     | +           | -         | +           | 2            | 2             | 8            | -         | -            |
| Pacearchaeota               | 44                    | 16    | 21    | -    | 1     | +           | -         | +           | -            | 19            | 27           | -         | -            |
| Parvarchaeota               | 4                     | 2     | 1     | -    | -     | +           | 1         | +           | -            | 4             | 2            | -         | -            |
| Woesearchaeota              | 36                    | 9     | 10    | -    | 1     | +           | 4         | +           | 1            | 25            | 12           | 3         | -            |
| <i>Nanoarchaeota</i>        | 6                     | -     | -     | -    | -     | -           | -         | -           | -            | 7             | 4            | -         | -            |
| <u>Euryarchaeota</u>        | 1016                  | 766   | 656   | 2    | 54    | +           | 1982      | +           | 920          | 1816          | 567          | 113       | 23           |
| <i>Archaeoglobi</i>         | 12                    | -     | -     | -    | -     | -           | 29        | +           | 3            | 6             | 1            | -         | -            |
| Hadesarchaea (70 °C)        | 6                     | -     | -     | -    | -     | -           | 3         | +           | 2            | 2             | 2            | -         | -            |
| Halobacteria                | 443                   | 342   | 258   | -    | -     | +           | 713       | +           | 427          | 664           | 331          | -         | -            |
| Methanobacteria             | 49                    | 41    | 41    | -    | 2     | +           | 159       | +           | -            | 28            | 24           | -         | -            |
| Methanococci                | 19                    | 7     | 1     | -    | -     | +           | 78        | +           | 11           | 17            | -            | -         | -            |
| Methanomicrobia             | 142                   | 141   | 119   | -    | 1     | +           | 494       | +           | 72           | 268           | 94           | -         | 22           |
| Methanonatronarchaeia       | 2                     | 2     | 2     | -    | -     | +           | 3         | +           | -            | 2             | -            | -         | -            |
| <i>Methanopyri</i>          | 1                     | -     | -     | -    | -     | -           | 5         | +           | 1            | -             | -            | -         | -            |

|                            |     |     |     |   |    |   |     |   |     |     |     |     |   |
|----------------------------|-----|-----|-----|---|----|---|-----|---|-----|-----|-----|-----|---|
| Theionarchaea              | 3   | -   | -   | - | -  | - | 6   | + | 1   | 3   | -   | -   | - |
| <b>Thermococci</b>         | 38  | 5   | 5   | - | -  | + | 95  | + | 84  | 92  | -   | -   | - |
| Palaeococcus               | 1   | -   | -   | - | -  | - | 2   | + | 2   | 1   | -   | -   | - |
| Pyrococcus                 | 8   | -   | -   | - | -  | - | 18  | + | 20  | 13  | -   | -   | - |
| <b>Thermococcus</b>        | 28  | 4   | 4   | - | -  | + | 73  | + | 59  | 75  | -   | -   | - |
| unclassified               | 1   | 1   | 1   | - | -  | + | 2   | + | 3   | 3   | -   | -   | - |
| <b>Thermoplasmata</b>      | 53  | 40  | 33  | - | 17 | + | 29  | + | 56  | 132 | 26  | 1   | - |
| Euryarchaeota_environment  | 6   | 9   | 6   | - | -  | + | 15  | + | 2   | 15  | 5   | 1   | - |
| Euryarchaeota_unclassified | 242 | 179 | 191 | 2 | 34 | + | 356 | + | 261 | 587 | 84  | 111 | 1 |
| <b>TACK</b>                | 265 | 91  | 86  | - | 13 | + | 319 | + | 102 | 439 | 180 | 3   | 2 |
| Bathyarchaeota             | 29  | 5   | 2   | - | -  | + | 34  | + | 24  | 10  | 4   | -   | - |
| <b>Korarchaeota</b>        | 4   | 1   | -   | - | 1  | + | 1   | + | 4   | 5   | 1   | -   | - |
| <b>Crenarchaeota</b>       | 102 | 20  | 5   | - | -  | + | 263 | + | 57  | 266 | 72  | -   | - |
| Acidilobales               | 9   | -   | -   | - | -  | - | 15  | + | 1   | 24  | 8   | -   | - |
| Desulfurococcales          | 22  | -   | -   | - | -  | - | 35  | + | 11  | 30  | 3   | -   | - |
| Fervidicoccales            | 3   | -   | -   | - | -  | - | 4   | + | -   | 4   | -   | -   | - |
| Sulfolobales               | 28  | 15  | -   | - | -  | + | 114 | + | 37  | 121 | 29  | -   | - |
| <b>Thermoproteales</b>     | 33  | -   | -   | - | -  | - | 93  | + | 3   | 70  | 25  | -   | - |
| Crenarchaeota_unclassified | 7   | 5   | 5   | - | 1  | + | 2   | + | 5   | 17  | 7   | -   | - |
| Thaumarchaeota             | 130 | 65  | 79  | - | -  | + | 19  | + | 17  | 158 | 103 | 3   | 2 |
| Archaea_environment        | 19  | 12  | 12  | - | 3  | + | 90  | + | 4   | 17  | 8   | -   | - |
| Archaea_unclassified       | 62  | 31  | 31  | - | 3  | + | 24  | + | 71  | 72  | 36  | 1   | - |

<sup>1</sup>Phylogenetic distribution of archaeal homologs of: 20S proteasome  $\alpha$ -type subunits (IPR023332), MsrA (IPR036509) (excludes type III ribulose biphosphate carboxylase homologs of IPR017712 originally misannotated as MsrA [1]), MsrB (IPR0025790), MsrP/Q (IPR022867/IPR022837), fRMsr, free MetO reductase conserved site (IPR000614) with archaeal homologs based on at least 30 % amino acid sequence identity by BlastP UniProt to *Thermoplasma acidophilum* fRMsr (Ta0848), MPT OR, molybdopterin oxidoreductases such as BisC (IPR006656); peroxiredoxins of the OsmC/Ohr (IPR003718) and AhpC (IPR024706) families; superoxide dismutase of the Fe/Mn SOD (IPR001189), Ni SOD (IPR014123) and Cu/Zn SOD (IPR036423) types. -, not detected by <http://www.ebi.ac.uk/interpro/> on August 6, 2018. (Hyper)thermophiles are indicated by red lettering with unclassified and environmental samples excluded from this latter analysis. Presence (green) or absence (pink) of a representative MSR homolog (MsrA, MsrB, fRMsr) excluding (MSR - MPT) or including (MSR + MPT) BisC-like MPT oxidoreductases is also indicated. Within the GAF-like domain superfamily, the conserved active site Cys<sub>A</sub> motif of fRMsr was used to distinguish fRMsr homologs from signaling proteins such as cGMP-specific phosphodiesterases, adenylyl cyclases and guanylyl cyclases [2].

**Table S2.** Domain architecture of MsrA- and MsrB-type methionine sulfoxide reductase homologs among Archaea<sup>1</sup>.

| (Super)phyla                      | MsrA (single domain) | MsrB (single domain) | MsrA-MsrB | MsrB-MsrA | MsrA-Trx-MsrB | AANH-MsrB | ThyX-MsrB | MsrA-Grx |
|-----------------------------------|----------------------|----------------------|-----------|-----------|---------------|-----------|-----------|----------|
| TACK                              | 89                   | 71                   | -         | -         | -             | -         | 2         | -        |
| Asgard                            | 10                   | 7                    | -         | 2         | -             | -         | -         | -        |
| Euryarchaeota                     | 668                  | 536                  | 78        | 10        | 2             | 61        | -         | 1        |
| DPANN_Woearchaeota                | 6                    | 6                    | 6         | -         | -             | 1         | -         | -        |
| DPANN_Pacearchaeota               | 13                   | 17                   | 4         | 2         | -             | -         | -         | -        |
| DPANN_Parvarchaeum                | 2                    | 1                    | -         | -         | -             | -         | -         | -        |
| DPANN_Nanoarchaeota               | -                    | -                    | -         | -         | -             | -         | -         | -        |
| DPANN_Nanohaloarchaeota           | 10                   | 15                   | -         | -         | -             | -         | -         | -        |
| DPANN_Micrarchaeota               | 5                    | 4                    | -         | -         | -             | -         | -         | -        |
| DPANN_Diapherotrites              | 1                    | 1                    | -         | -         | -             | -         | -         | -        |
| Archaea_Unclassified              | 36                   | 37                   | 8         | -         | -             | -         | -         | -        |
| Total:                            | 840                  | 695                  | 96        | 14        | 2             | 62        | 2         | 1        |
| (SignalP, TAT or TM) <sup>2</sup> | 15                   | 10                   | 22        | 2         | 2             | 1         | -         | -        |

<sup>1</sup>Methionine sulfoxide reductase MsrA-type (IPR036509) and MsrB-type (IPR002579) homologs are found as single domain proteins or fused in tandem or with alternative domains including: ThyX (thymidylate synthase, IPR003669), ANAH (adenylation) domain of the QueC-type (queosine biosynthesis protein QueC, IPR018317), Grx (glutaredoxin, IPR002109) or Trx (thioredoxin-like, IPR036249) domains. <sup>2</sup>A subset of MsrA- and MsrB-type homologs have predicted TM (transmembrane spanning helix based on <http://www.cbs.dtu.dk/services/TMHMM/>), TAT (twin arginine translocation (TAT) motifs based on <http://signalfind.org/tatfind.html>) and/or SignalP (signal sequence) motifs for general (Sec) translocation based on <http://www.cbs.dtu.dk/services/SignalP/>).

**Table S3.** Archaeal methionine sulfoxide reductases biochemically and/or structurally characterized.

| Organism                                       | MSR-type (locus tag) | Substrate                                                                         | Reductant                                        | Active site                                                | Ubl site                           | PDB          | Ref.   |
|------------------------------------------------|----------------------|-----------------------------------------------------------------------------------|--------------------------------------------------|------------------------------------------------------------|------------------------------------|--------------|--------|
| <i>Thermococcus kodakarensis</i>               | MsrAB (TK0819)       | MetO                                                                              | DTT                                              | C17 (A)                                                    | -                                  | -            | [3]    |
|                                                | MsrA' (TK0819)       | Met-S-O, dabsyl-Met-S-O                                                           | DTT                                              | C20 (R)?                                                   |                                    |              |        |
|                                                | 'MsrB (TK0819)       | Met-R-O, dabsyl-Met-R-O                                                           | DTT, cysteine                                    | C278 (R)?<br>C283 (R)?<br>C311 (A)                         |                                    |              |        |
| <i>Methanothermobacter thermoautotrophicus</i> | MsrB (MTH711)        | Met-R-O, Lys-Ile-Phe-MetO-Lys, H <sub>2</sub> O <sub>2</sub> -oxidized calmodulin | DTT, cysteine                                    | C64 (Zn)<br>C67 (Zn)<br>C113 (Zn)<br>C116 (Zn)<br>C139 (A) | -                                  | 2K8D         | [4, 5] |
| <i>Thermoplasma acidophilum</i>                | fRMsR (Ta0848)       | Met-R-O                                                                           | NADPH > <i>E. coli</i> Trx > human Trx reductase | C84 (A)<br>C60 (C)                                         | -                                  | 4MMN<br>4MN7 | [6]    |
| <i>Haloferax volcanii</i>                      | MsrA (HVO_A0230)     | dabsyl-Met-(R/S)-O                                                                | DTT                                              | C13 (A)<br>C16 (R)?<br>C48 (R)?<br>C162 (R)?               | K108, K169,<br>K172, K180,<br>K182 | -            | [7, 8] |
|                                                | MsrB (HVO_2234)      | dabsyl-Met-(R/S)-O                                                                | DTT                                              | C49 (Zn)<br>C52 (Zn)<br>C97 (Zn)<br>C100 (Zn)<br>C120 (A)  | K117                               | -            |        |

-, not determined. PDB, Protein Data Bank accession number. Cysteine nucleophile (A), resolving (R), Zn<sup>2+</sup> binding (Zn) or critical (C) residues are indicated with predicted in italics. Ubl, ubiquitin-like modification site. MsrA' and 'MsrB, are domains isolated from MsrAB. Trx, thioredoxin.

**Table S4.** Archaeal methionine sulfoxide reductases regulated at the protein and/or transcript level.

| Organism                         | MSR-type (locus tag) | Condition                                                   | Effect                                                                        | Ref. |
|----------------------------------|----------------------|-------------------------------------------------------------|-------------------------------------------------------------------------------|------|
| <i>Thermococcus kodakarensis</i> | MsrAB (TK0819)       | Low temperature                                             | Protein level – up                                                            | [3]  |
|                                  |                      | High salt                                                   | Protein level – up                                                            | [9]  |
|                                  |                      | Oxidative stress (saturating oxygen)                        | Protein level – up                                                            | [9]  |
| <i>Sulfolobus solfataricus</i>   | MsrA (SSO1503)       | UV irradiation                                              | Transcript level – up                                                         | [10] |
| <i>Sulfolobus acidocaldarius</i> | MsrA (Saci_1170)     | UV irradiation                                              | Transcript level – up                                                         | [10] |
| <i>Halobacterium salinarum</i>   | MsrB (VNG1404G)      | Oxidative stress (paraquat, H <sub>2</sub> O <sub>2</sub> ) | Transcript level – up (member of RosR regulon core)                           | [11] |
| <i>Halobacterium salinarum</i>   | MsrA (VNG1180G)      | Oxidative stress (paraquat, H <sub>2</sub> O <sub>2</sub> ) | Transcript level – up                                                         | [12] |
| <i>Haloferax volcanii</i>        | MsrA (HVO_A0230)     | Mild oxidant (DMSO)                                         | Protein level:<br>Ubiquitin-like modified form – up<br>Unmodified form – down | [8]  |

---

## References (for supplemental information)

1. Tabita F.R.; Hanson T.E.; Li H.; Satagopan S.; Singh J.; Chan S. Function, structure, and evolution of the RubisCO-like proteins and their RubisCO homologs. *Microbiol Mol Biol Rev.* **2007**;71(4):576-99.
2. Lin Z.; Johnson L.C.; Weissbach H.; Brot N.; Lively M.O.; Lowther W.T. Free methionine-(R)-sulfoxide reductase from *Escherichia coli* reveals a new GAF domain function. *Proc Natl Acad Sci U S A.* **2007**;104(23):9597-602.
3. Fukushima E.; Shinka Y.; Fukui T.; Atomi H.; Imanaka T. Methionine sulfoxide reductase from the hyperthermophilic archaeon *Thermococcus kodakaraensis*, an enzyme designed to function at suboptimal growth temperatures. *J Bacteriol.* **2007**;189(19):7134-44.
4. Carella M.; Becher J.; Ohlenschläger O.; Ramachandran R.; Gührs K.H.; Wellenreuther G.; Meyer-Klaucke W.; Heinemann S.H.; Görlach M. Structure-function relationship in an archaeobacterial methionine sulfoxide reductase B. *Mol Microbiol.* **2011**;79(2):342-58.
5. Carella M.; Ohlenschläger O.; Ramachandran R.; Görlach M. <sup>1</sup>H, <sup>13</sup>C and <sup>15</sup>N resonance assignment of a zinc-binding methionine sulfoxide reductase type-B from the thermophilic archaeobacterium *Methanothermobacter thermoautotrophicus*. *Biomol NMR Assign.* **2010**;4(1):93-5.
6. Kim H.S.; Kwak G.H.; Lee K.; Jo C.H.; Hwang K.Y.; Kim H.Y. Structural and biochemical analysis of a type II free methionine-R-sulfoxide reductase from *Thermoplasma acidophilum*. *Arch Biochem Biophys.* **2014**;560:10-9.
7. Dantuluri S.; Wu Y.; Hepowit N.L.; Chen H.; Chen S.; Maupin-Furlow J.A. Proteome targets of ubiquitin-like sump1ylation are associated with sulfur metabolism and oxidative stress in *Haloferax volcanii*. *Proteomics.* **2016**;16(7):1100-10.
8. Fu X.; Adams Z.; Liu R.; Hepowit N.L.; Wu Y.; Bowmann C.F.; Moskovitz J.; Maupin-Furlow J.A. Methionine sulfoxide reductase A (MsrA) and its function in ubiquitin-like protein modification in Archaea. *MBio.* **2017**;8(5):e01169-17.
9. Jia B.; Liu J.; Van Duyet L.; Sun Y.; Xuan Y.H.; Cheong G.W. Proteome profiling of heat, oxidative, and salt stress responses in *Thermococcus kodakarensis* KOD1. *Front Microbiol.* **2015**;6:605.
10. Gotz D.; Paytubi S.; Munro S.; Lundgren M.; Bernander R.; White M.F. Responses of hyperthermophilic crenarchaea to UV irradiation. *Genome Biol.* **2007**;8(10):R220.
11. Sharma K.; Gillum N.; Boyd J.L.; Schmid A. The RosR transcription factor is required for gene expression dynamics in response to extreme oxidative stress in a hypersaline-adapted archaeon. *BMC Genomics.* **2012**;13:351.
12. Kaur A.; Van P.T.; Busch C.R.; Robinson C.K.; Pan M.; Pang W.L.; Reiss D.J.; DiRuggiero J.; Baliga N.S. Coordination of frontline defense mechanisms under severe oxidative stress. *Mol Syst Biol.* **2010**;6:393.
